# Supplementary material for: Large-gap Peripheral Nerve Repair Using Xenogeneic Transplants in Rhesus Macaques
Source: Research Square preprint supplement (doi:10.21203/rs.3.rs-846240/v2), 2022-02-28
Supplement: Supplementary file 1 [file 3cf435dd445b81b55b565c4b.pdf]

| PERV and porcine centromeric DNA confirm presence of porcine cells |                            |              |                                   |                   |
|--------------------------------------------------------------------|----------------------------|--------------|-----------------------------------|-------------------|
| Sample                                                             | Target Centromeric Porcine | Target PERV  | Target 18s (mean C <sub>T</sub> ) | C <sub>T</sub> SD |
| <b>A3002</b>                                                       | Undetermined               | Undetermined | 27.24                             | 0.07              |
| <b>A3101</b>                                                       | Undetermined               | Undetermined | 26.89                             | 0.06              |
| <b>A3103</b>                                                       | Undetermined               | Undetermined | 26.86                             | 0.06              |
| <b>A4003</b>                                                       | Undetermined               | Undetermined | 28.00                             | 0.04              |
| <b>A4101</b>                                                       | Undetermined               | Undetermined | 27.70                             | 0.27              |
| <b>X3002</b>                                                       | Undetermined               | Undetermined | 26.72                             | 0.81              |
| <b>X3101</b>                                                       | Undetermined               | Undetermined | 27.13                             | 0.08              |
| <b>X3101</b>                                                       | Undetermined               | Undetermined | 27.41                             | 0.06              |
| <b>X4003</b>                                                       | Undetermined               | Undetermined | 28.58                             | 0.34              |
| <b>X4101</b>                                                       | Undetermined               | Undetermined | 27.32                             | 0.04              |

Table X: Autografts and Xenografts were tested for the presence of PERV and porcine centromeric DNA to confirm the presence of porcine cells at the end of the experiment. 18s was utilised as an internal control to confirm the validity of the Q-PCR. Ct values were consistent with the presence of DNA and indicated no inhibition in the analysis.
